# Supplementary material
Source: PubMed Central journal article supplement (PMC6242273)
Supplement: NIHMS1501881-supplement-2.pdf [file NIHMS1501881-supplement-2.pdf]

**Supplemental Table 2 – Type of Complication by Etiology of Cardiomyopathy**

|                    | Heart block | Pericardial Effusion | Tamponade | RV/LV perf | Vascular Cx | LV clot | Coronary artery injury | Valvular injury | TIA | Intra-cranial bleed | Intra-abdominal bleed | PE | Cardiac Arrest/PEA | Loss of LV lead capture | Phrenic nerve injury | Un-specified bleeding |
|--------------------|-------------|----------------------|-----------|------------|-------------|---------|------------------------|-----------------|-----|---------------------|-----------------------|----|--------------------|-------------------------|----------------------|-----------------------|
| <b>DICM</b>        | 4           | 5                    | 2         | 4          | 0           | 1       | 1                      | 1               | 1   | 1                   | 1                     | 3  | 2                  | 1                       | 1                    | 1                     |
| <b>ARVC</b>        | 0           | 1                    | 0         | 0          | 0           | 0       | 1                      | 0               | 0   | 0                   | 0                     | 1  | 0                  | 0                       | 0                    | 0                     |
| <b>Valvular</b>    | 2           | 0                    | 0         | 0          | 1           | 0       | 0                      | 0               | 0   | 0                   | 0                     | 1  | 0                  | 0                       | 0                    | 0                     |
| <b>Myocarditis</b> | 1           | 1                    | 1         | 0          | 1           | 0       | 0                      | 0               | 0   | 0                   | 0                     | 0  | 0                  | 0                       | 0                    | 0                     |
| <b>HCM</b>         | 1           | 0                    | 0         | 2          | 0           | 0       | 0                      | 1               | 0   | 0                   | 0                     | 0  | 0                  | 0                       | 0                    | 0                     |
| <b>Sarcoidosis</b> | 0           | 1                    | 0         | 0          | 1           | 0       | 0                      | 0               | 0   | 0                   | 0                     | 0  | 0                  | 0                       | 0                    | 0                     |

RV/LV perf = ventricular perforation; TIA = transient ischemic attack, PEA = pulseless electrical activity.
